# Supplementary material
Source: ML conference proceedings conference paper supplement (https://proceedings.mlr.press/v54/wang17a.html)
Supplement: Supplementary file [file wang17a-supp.pdf]

# Appendix: Tensor Decompositions via Two-Mode Higher-Order SVD (HOSVD)

Miaoyan Wang<sup>1</sup> and Yun S. Song<sup>1,2</sup>

<sup>1</sup>University of Pennsylvania

<sup>2</sup>University of California, Berkeley

## A Characterization of Robust Eigenvectors

*Proof of Theorem 3.2.* The necessity is obvious. To prove the sufficiency, note that the tensor decomposition  $\mathcal{T} = \sum_{i=1}^r \lambda_i \mathbf{u}_i^{\otimes k}$  implies the two-mode HOSVD:

$$\mathcal{T}_{(12)(3\dots k)} = \sum_{i=1}^r \lambda_i \text{Vec}(\mathbf{u}_i^{\otimes 2}) \text{Vec}(\mathbf{u}_i^{\otimes(k-2)})^T, \quad (1)$$

where each  $\lambda_i > 0$  and  $\text{Vec}(\mathbf{u}_i^{\otimes 2})$  is the  $i$ th left singular vector corresponding to  $\lambda_i$ . Now suppose  $\text{Vec}(\mathbf{a}^{\otimes 2})$  is the left singular vector of  $\mathcal{T}_{(12)(3\dots k)}$  corresponding to a non-zero singular value  $\lambda \in \mathbb{R} \setminus \{0\}$ . Then, by (1), we must have

$$\text{Vec}(\mathbf{a}^{\otimes 2}) \in \text{Span}\{\text{Vec}(\mathbf{u}_i^{\otimes 2}) : i \in [r] \text{ for which } \lambda_i = \lambda\}.$$

Hence, there exist coefficients  $\{\alpha_i\}$  such that  $\text{Vec}(\mathbf{a}^{\otimes 2}) = \sum_{i \in [r] : \lambda_i = \lambda} \alpha_i \text{Vec}(\mathbf{u}_i^{\otimes 2})$ . In matrix form, this reads

$$\mathbf{a}^{\otimes 2} = \sum_{i \in [r] : \lambda_i = \lambda} \alpha_i \mathbf{u}_i^{\otimes 2},$$

where  $\{\mathbf{u}_i\}$  is a set of orthonormal vectors. Notice that the matrix on the right-hand side has rank  $|\{i \in [r] : \lambda_i = \lambda\}|$  while the matrix on the left-hand side has rank 1. Since the rank of a matrix is unambiguously determined, we must have  $|\{i \in [r] : \lambda_i = \lambda\}| = 1$ . Therefore,  $\mathbf{a}^{\otimes 2} = \mathbf{u}_{i^*}^{\otimes 2}$  holds for some  $i^* \in [r]$ ; that is,  $\mathbf{a}$  is a robust eigenvector of  $\mathcal{T}$ .  $\square$

## B Exact Recovery for SOD Tensors

### B.1 Proof of Proposition 3.3

*Proof of Proposition 3.3.* Suppose  $\mathbf{M}$  is a rank-1 matrix in  $\mathcal{LS}_0 = \text{Span}\{\mathbf{u}_1^{\otimes 2}, \dots, \mathbf{u}_r^{\otimes 2}\}$ , where each  $\mathbf{u}_i$  is a robust eigenvector of  $\mathcal{T}$ . Thus, there exist coefficients  $\{\alpha_i\}_{i \in [r]}$  such that

$$\mathbf{M} = \alpha_1 \mathbf{u}_1^{\otimes 2} + \dots + \alpha_r \mathbf{u}_r^{\otimes 2}.$$

Notice that  $\{\mathbf{u}_i\}$  is a set of orthonormal vectors and the rank of a matrix is unambiguously determined. We must have  $|\{i \in [r] : \alpha_i \neq 0\}| = 1$ . Hence,  $\mathbf{M} = \alpha_{i^*} \mathbf{u}_{i^*}^{\otimes 2}$  holds for some  $i^* \in [r]$ .  $\square$

### B.2 Proof of Theorem 3.4

*Proof of Theorem 3.4.* Note that every matrix  $\mathbf{M} \in \mathcal{LS}_0$  can be written as  $\mathbf{M} = \alpha_1 \mathbf{u}_1^{\otimes 2} + \dots + \alpha_r \mathbf{u}_r^{\otimes 2}$ , where  $\{\alpha_i\}_{i \in [r]}$  is a set of scalars in  $\mathbb{R}$ . Thus, the optimization problem is equivalent to

$$\max_{\alpha_1^2 + \dots + \alpha_r^2 = 1} \|\alpha_1 \mathbf{u}_1^{\otimes 2} + \dots + \alpha_r \mathbf{u}_r^{\otimes 2}\|_{\sigma} = \max_{\alpha_1^2 + \dots + \alpha_r^2 = 1} \max_{i \in [r]} |\alpha_i|. \quad (2)$$

Let  $f(\boldsymbol{\alpha}) = \max_{i \in [r]} |\alpha_i|$  denote the objective function in (2), where  $\boldsymbol{\alpha} = (\alpha_1, \dots, \alpha_r)^T \in \mathbf{S}^{r-1}$ . Notice that the objective is upper bounded by 1; i.e.,  $f(\boldsymbol{\alpha}) \leq 1$  for all  $\boldsymbol{\alpha} \in \mathbf{S}^{r-1}$ . Suppose  $\boldsymbol{\alpha}^* = (\alpha_1^*, \dots, \alpha_r^*)^T \in \mathbf{S}^{r-1}$  is a local maximizer of (2). We show below that  $f(\boldsymbol{\alpha}^*) = 1$ .

Suppose  $f(\boldsymbol{\alpha}^*) \neq 1$ . Then we must have  $\max_{i \in [r]} |\alpha_i^*| < 1$ . Without loss of generality, assume  $\alpha_1^*$  is the element with the largest magnitude in the set  $\{\alpha_i^*\}_{i \in [r]}$ . Since  $|\alpha_1^*| < 1$  and  $(\alpha_1^*)^2 + \dots + (\alpha_r^*)^2 = 1$ , there must also exist some  $j \geq 2$  such that  $\alpha_j^* \neq 0$ . Without loss of generality again, assume  $\alpha_2^* \neq 0$ . Now construct another vector  $\tilde{\boldsymbol{\alpha}} = (\tilde{\alpha}_1, \dots, \tilde{\alpha}_r)^T \in \mathbb{R}^r$ , where

$$\tilde{\alpha}_i = \begin{cases} \alpha_1^* \eta, & i = 1, \\ \text{sign}(\alpha_2^*) \sqrt{(\alpha_2^*)^2 - (\eta^2 - 1)(\alpha_1^*)^2}, & i = 2, \\ \alpha_i^*, & i = 3, \dots, r, \end{cases}$$

and  $\eta \in \mathbb{R}_+$  is any value in  $\left(1, \frac{\sqrt{(\alpha_1^*)^2 + (\alpha_2^*)^2}}{\alpha_1^*}\right]$ . It is easy to verify that  $\tilde{\boldsymbol{\alpha}} \in \mathcal{S}^{r-1}$  for all such  $\eta$ . Moreover,

$$\begin{aligned} \|\tilde{\boldsymbol{\alpha}} - \boldsymbol{\alpha}^*\|_2^2 &= \sum_{i=1}^r (\tilde{\alpha}_i - \alpha_i^*)^2 = (\alpha_1^*)^2 (\eta - 1)^2 + (\alpha_2^* - \tilde{\alpha}_2)^2 \\ &\leq (\alpha_1^*)^2 (\eta - 1)^2 + (\alpha_2^*)^2 + (\tilde{\alpha}_2)^2 - 2(\tilde{\alpha}_2)^2 = 2(\alpha_1^*)^2 \eta (\eta - 1). \end{aligned}$$

As we see in the right-hand side of the above inequality, the distance between  $\tilde{\boldsymbol{\alpha}}$  and  $\boldsymbol{\alpha}^*$  can be arbitrarily small as  $\eta \rightarrow 1^+$ . However,  $f(\tilde{\boldsymbol{\alpha}}) = |\alpha_1^* \eta| > f(\boldsymbol{\alpha}^*)$ , which contradicts the local optimality of  $\boldsymbol{\alpha}^*$ . Hence, we must have  $f(\boldsymbol{\alpha}^*) = 1$ , which completes the proof of (A1). As an aside, we have also proved that every local maximizer of (2) is a global maximizer.

To see that there are exactly  $r$  pairs of maximizers in  $\mathcal{LS}_0$ , just notice that  $\|\mathbf{M}^*\|_\sigma / \|\mathbf{M}^*\|_F = 1$  is equivalent to saying  $\mathbf{M}^*$  is a rank-1 matrix. Thus by Proposition 3.3,  $\mathbf{M}^* = \pm \mathbf{u}_i^{\otimes 2}$  for some  $i \in [r]$ . Conversely, every matrix of the form  $\pm \mathbf{u}_i^{\otimes 2}$  is a maximizer in  $\mathcal{LS}_0$  since  $\|\mathbf{u}_i^{\otimes 2}\|_\sigma = 1$ . The conclusions (A2) and (A3) then follow from the property of  $\{\mathbf{u}_i^{\otimes 2}\}_{i \in [r]}$ .  $\square$

## C Two-Mode HOSVD via Nearly Matrix Pursuit

### C.1 Auxiliary Theorems

The following results pertain to standard perturbation theory for the singular value decomposition of matrices. For any matrix  $\mathbf{X}$ , we use  $\mathbf{X}^\dagger$  to denote the Hermitian transpose of  $\mathbf{X}$ . Given a diagonal matrix  $\boldsymbol{\Sigma}$  of singular values, let  $\sigma_{\min}(\boldsymbol{\Sigma})$  and  $\sigma_{\max}(\boldsymbol{\Sigma})$  denote, respectively, the minimum and the maximum singular values in  $\boldsymbol{\Sigma}$ .

**Theorem C.1** (Wedin [3]). *Let  $\mathbf{B}$  and  $\tilde{\mathbf{B}}$  be two  $m \times n$  ( $m \geq n$ ) real or complex matrices with SVDs*

$$\mathbf{B} = \mathbf{U} \boldsymbol{\Sigma} \mathbf{V}^\dagger \equiv (\mathbf{U}_1, \mathbf{U}_2) \begin{pmatrix} \boldsymbol{\Sigma}_1 & \mathbf{0} \\ \mathbf{0} & \boldsymbol{\Sigma}_2 \\ \mathbf{0} & \mathbf{0} \end{pmatrix} \begin{pmatrix} \mathbf{V}_1^\dagger \\ \mathbf{V}_2^\dagger \end{pmatrix}, \quad (3)$$

$$\tilde{\mathbf{B}} = \tilde{\mathbf{U}} \tilde{\boldsymbol{\Sigma}} \tilde{\mathbf{V}}^\dagger \equiv (\tilde{\mathbf{U}}_1, \tilde{\mathbf{U}}_2) \begin{pmatrix} \tilde{\boldsymbol{\Sigma}}_1 & \mathbf{0} \\ \mathbf{0} & \tilde{\boldsymbol{\Sigma}}_2 \\ \mathbf{0} & \mathbf{0} \end{pmatrix} \begin{pmatrix} \tilde{\mathbf{V}}_1^\dagger \\ \tilde{\mathbf{V}}_2^\dagger \end{pmatrix}, \quad (4)$$

and

$$\begin{aligned} \boldsymbol{\Sigma}_1 &= \text{diag}(\sigma_1, \dots, \sigma_k), & \boldsymbol{\Sigma}_2 &= \text{diag}(\sigma_{k+1}, \dots, \sigma_n), \\ \tilde{\boldsymbol{\Sigma}}_1 &= \text{diag}(\tilde{\sigma}_1, \dots, \tilde{\sigma}_k), & \tilde{\boldsymbol{\Sigma}}_2 &= \text{diag}(\tilde{\sigma}_{k+1}, \dots, \tilde{\sigma}_n), \end{aligned} \quad (5)$$

with  $\sigma_1 \geq \sigma_2 \geq \dots \geq \sigma_n$  and  $\tilde{\sigma}_1 \geq \tilde{\sigma}_2 \geq \dots \geq \tilde{\sigma}_n$  in descending order. If there exist an  $\alpha \geq 0$  and a  $\delta > 0$  such that

$$\sigma_{\min}(\boldsymbol{\Sigma}_1) = \sigma_k \geq \alpha + \delta \quad \text{and} \quad \sigma_{\max}(\tilde{\boldsymbol{\Sigma}}_2) = \tilde{\sigma}_{k+1} \leq \alpha, \quad (6)$$

then

$$\max \left\{ \left\| \sin \Theta(\mathbf{U}_1, \tilde{\mathbf{U}}_1) \right\|_\sigma, \left\| \sin \Theta(\mathbf{V}_1, \tilde{\mathbf{V}}_1) \right\|_\sigma \right\} \leq \frac{\max \left\{ \left\| \tilde{\mathbf{B}} \mathbf{V}_1 - \mathbf{U}_1 \boldsymbol{\Sigma}_1 \right\|_\sigma, \left\| \tilde{\mathbf{B}}^\dagger \mathbf{U}_1 - \mathbf{V}_1 \boldsymbol{\Sigma}_1 \right\|_\sigma \right\}}{\delta}.$$

*Remark C.2.* In the above theorem,  $\mathbf{U}_1, \tilde{\mathbf{U}}_1$  are  $d$ -by- $k$  matrices and  $\Theta(\mathbf{U}_1, \tilde{\mathbf{U}}_1)$  denotes the matrix of canonical angles between the ranges of  $\mathbf{U}_1$  and  $\tilde{\mathbf{U}}_1$ . If we let  $\mathcal{L}$  (standing for “left” singular vectors) and  $\tilde{\mathcal{L}}$  denote the column spaces of  $\mathbf{U}_1$  and  $\tilde{\mathbf{U}}_1$  respectively, then by definition,  $\left\| \sin \Theta(\mathbf{U}_1, \tilde{\mathbf{U}}_1) \right\|_\sigma \stackrel{\text{def}}{=} \left\| \mathbf{U}_1^T \tilde{\mathbf{U}}_1^\perp \right\|_\sigma = \max_{\mathbf{x} \in \mathcal{L}, \mathbf{y} \in \tilde{\mathcal{L}}} \frac{\mathbf{x}^T \mathbf{y}}{\|\mathbf{x}\|_2 \|\mathbf{y}\|_2}$ . When no confusion arises, we will simply use  $\sin \Theta(\mathcal{L}, \tilde{\mathcal{L}})$  to denote  $\left\| \sin \Theta(\mathbf{U}_1, \tilde{\mathbf{U}}_1) \right\|_\sigma$ .

**Proposition C.3.** *Let  $\mathcal{L}_1, \mathcal{L}_2$  be two subspaces in  $\mathbb{R}^d$ . Then for any vector  $\mathbf{u}_1 \in \mathcal{L}_1$ ,*

$$\sin \Theta(\mathbf{u}_1, \mathcal{L}_2) \leq \sin \Theta(\mathcal{L}_1, \mathcal{L}_2).$$

*Proof.* The conclusion follows readily from Remark C.2. □

**Theorem C.4** (Weyl [4]). *Let  $\mathbf{B}$  and  $\tilde{\mathbf{B}}$  be two matrices with SVDs (3), (4), and (5). Then,*

$$|\tilde{\sigma}_i - \sigma_i| \leq \left\| \tilde{\mathbf{B}} - \mathbf{B} \right\|_\sigma \quad \text{for all } i = 1, \dots, n.$$

In our proofs, we often make use of the following corollary based on Wedin’s and Weyl’s Theorems.

**Corollary C.5.** *Let  $\mathbf{B}$  and  $\tilde{\mathbf{B}}$  be two matrices with SVDs (3), (4), and (5). Let  $\mathbf{E} \stackrel{\text{def}}{=} \tilde{\mathbf{B}} - \mathbf{B}$ , and  $\mathcal{L}, \mathcal{R}, \tilde{\mathcal{L}}$  and  $\tilde{\mathcal{R}}$  be the column spaces of  $\mathbf{U}_1, \mathbf{V}_1, \tilde{\mathbf{U}}_1$  and  $\tilde{\mathbf{V}}_1$ , respectively. Define  $\Delta = \min\{\sigma_{\min}(\mathbf{\Sigma}_1), \sigma_{\min}(\mathbf{\Sigma}_1) - \sigma_{\max}(\mathbf{\Sigma}_2)\}$ . If  $\Delta > \|\mathbf{E}\|_\sigma$ , then*

$$\max \left\{ \sin \Theta(\mathcal{L}, \tilde{\mathcal{L}}), \sin \Theta(\mathcal{R}, \tilde{\mathcal{R}}) \right\} \leq \frac{\|\mathbf{E}\|_\sigma}{\Delta - \|\mathbf{E}\|_\sigma}. \quad (7)$$

*Proof.* By Weyl’s theorem,  $\sigma_{\max}(\mathbf{\Sigma}_2) - \sigma_{\max}(\tilde{\mathbf{\Sigma}}_2) \geq -\|\mathbf{E}\|_\sigma$ . Combining this with the assumption  $\sigma_{\min}(\mathbf{\Sigma}_1) - \sigma_{\max}(\mathbf{\Sigma}_2) > \|\mathbf{E}\|_\sigma$ , we have

$$\sigma_{\min}(\mathbf{\Sigma}_1) - \sigma_{\max}(\tilde{\mathbf{\Sigma}}_2) = \sigma_{\min}(\mathbf{\Sigma}_1) - \sigma_{\max}(\mathbf{\Sigma}_2) + \sigma_{\max}(\mathbf{\Sigma}_2) - \sigma_{\max}(\tilde{\mathbf{\Sigma}}_2) > \|\mathbf{E}\|_\sigma - \|\mathbf{E}\|_\sigma = 0.$$

This implies that the spectrum of  $\mathbf{\Sigma}_1$  is well-separated from that of  $\tilde{\mathbf{\Sigma}}_2$ , and thus (6) holds with  $\alpha = \max\{0, \sigma_{\max}(\tilde{\mathbf{\Sigma}}_2)\} \geq 0$  and  $\delta = \sigma_{\min}(\mathbf{\Sigma}_1) - \alpha > 0$ . By Wedin’s theorem, we get

$$\max \left\{ \sin \Theta(\mathcal{L}, \tilde{\mathcal{L}}), \sin \Theta(\mathcal{R}, \tilde{\mathcal{R}}) \right\} \leq \frac{\left\{ \left\| \tilde{\mathbf{B}}\mathbf{V}_1 - \mathbf{U}_1\mathbf{\Sigma}_1 \right\|_\sigma, \left\| \tilde{\mathbf{B}}^\dagger\mathbf{U}_1 - \mathbf{V}_1\mathbf{\Sigma}_1 \right\|_\sigma \right\}}{\delta}.$$

Then, noting

$$\begin{aligned} \left\| \tilde{\mathbf{B}}\mathbf{V}_1 - \mathbf{U}_1\mathbf{\Sigma}_1 \right\|_\sigma &= \left\| \tilde{\mathbf{B}}\mathbf{V}_1 - \mathbf{B}\mathbf{V}_1 \right\|_\sigma = \left\| \tilde{\mathbf{B}} - \mathbf{B} \right\|_\sigma = \|\mathbf{E}\|_\sigma, \\ \left\| \tilde{\mathbf{B}}^\dagger\mathbf{U}_1 - \mathbf{V}_1\mathbf{\Sigma}_1 \right\|_\sigma &= \left\| \tilde{\mathbf{B}}^\dagger\mathbf{U}_1 - \mathbf{B}^\dagger\mathbf{U}_1 \right\|_\sigma = \left\| \tilde{\mathbf{B}}^\dagger - \mathbf{B}^\dagger \right\|_\sigma = \|\mathbf{E}\|_\sigma, \end{aligned}$$

and

$$\delta = \sigma_{\min}(\mathbf{\Sigma}_1) - \max\{0, \sigma_{\max}(\tilde{\mathbf{\Sigma}}_2)\} \geq \sigma_{\min}(\mathbf{\Sigma}_1) - \max\{0, \sigma_{\max}(\mathbf{\Sigma}_2)\} - \|\mathbf{E}\|_\sigma = \Delta - \|\mathbf{E}\|_\sigma,$$

we obtain (7). □

**Lemma C.6** (Taylor Expansion). *If  $\varepsilon = o(1)$ , then*

- $(1 + \varepsilon)^\alpha = 1 + \alpha\varepsilon + o(\varepsilon), \quad \forall \alpha \in \mathbb{R};$
- $\sin \varepsilon = \varepsilon + o(\varepsilon^2);$
- $\cos \varepsilon = 1 - \frac{1}{2}\varepsilon^2 + o(\varepsilon^2).$

## C.2 Proof of Proposition 4.2 (Uniqueness of $\mathcal{LS}^{(r)}$ )

*Proof of Proposition 4.2.* Let  $\tilde{\mathcal{T}}_{(12)(3\dots k)} = \sum_i \mu_i \mathbf{a}_i \mathbf{b}_i^T$  be the two-mode HOSVD with  $\{\mu_i\}$  in descending order, and  $\mathcal{LS}^{(r)} = \text{Span}\{\mathbf{a}_1, \dots, \mathbf{a}_r\}$  is the  $r$ -truncated two-mode singular space. In order to show that  $\mathcal{LS}^{(r)}$  is uniquely determined, it suffices to show that  $\mu_r$  is strictly larger than  $\mu_{r+1}$ .

Note that the tensor perturbation model  $\tilde{\mathcal{T}} = \sum_{i=1}^r \lambda_i \mathbf{u}_i^{\otimes k} + \mathcal{E}$  implies the matrix perturbation model

$$\tilde{\mathcal{T}}_{(12)(3\dots k)} = \sum_{i=1}^r \lambda_i \text{Vec}(\mathbf{u}_i^{\otimes 2}) \text{Vec}(\mathbf{u}_i^{\otimes (k-2)})^T + \mathcal{E}_{(12)(3\dots k)}, \quad (8)$$

where by [2]

$$\|\mathcal{E}_{(12)(3\dots k)}\|_{\sigma} \leq d^{(k-2)/2} \|\mathcal{E}\|_{\sigma} \leq d^{(k-2)/2} \varepsilon. \quad (9)$$

Now apply Corollary C.5 to (8) with  $\tilde{\mathbf{B}} = \tilde{\mathcal{T}}_{(12)(3\dots k)}$ ,  $\mathbf{B} = \sum_{i=1}^r \lambda_i \text{Vec}(\mathbf{u}_i^{\otimes 2}) \text{Vec}(\mathbf{u}_i^{\otimes (k-2)})^T$ , and  $\tilde{\mathbf{B}} - \mathbf{B} = \mathcal{E}_{(12)(3\dots k)}$ . Considering the corresponding  $r$ th and  $(r+1)$ th singular values of  $\tilde{\mathbf{B}}$  and  $\mathbf{B}$ , we obtain

$$|\mu_r - \lambda_r| \leq \|\mathcal{E}_{(12)(3\dots k)}\|_{\sigma}, \quad \text{and} \quad |\mu_{r+1} - 0| \leq \|\mathcal{E}_{(12)(3\dots k)}\|_{\sigma},$$

which implies

$$\mu_r - \mu_{r+1} = \lambda_r + (\mu_r - \lambda_r) - (\mu_{r+1} - 0) \geq \lambda_r - 2 \|\mathcal{E}_{(12)(3\dots k)}\|_{\sigma}.$$

By (9) and Assumption 4.1,

$$\lambda_r - 2 \|\mathcal{E}_{(12)(3\dots k)}\|_{\sigma} \geq \lambda_{\min} - 2d^{(k-2)/2} \varepsilon > 0.$$

Therefore  $\mu_r > \mu_{r+1}$ , which ensures the uniqueness of  $\mathcal{LS}^{(r)}$ .  $\square$

## C.3 Proof of Theorem 4.4 (Perturbation of $\mathcal{LS}_0$ )

**Definition C.7** (Singular Space). Let  $\tilde{\mathcal{T}}_{(12)(3\dots k)} \in \mathbb{R}^{d^2 \times d^{k-2}}$  be the two-mode unfolding of  $\tilde{\mathcal{T}}$ , and  $\tilde{\mathcal{T}}_{(12)(3\dots k)} = \sum_i \mu_i \mathbf{a}_i \mathbf{b}_i^T$  be the two-mode HOSVD with  $\mu_1 \geq \mu_2 \geq \dots \geq \mu_r$  in descending order. We define the  $r$ -truncated left (respectively, right) singular space by

$$\begin{aligned} \mathcal{LS}^{(r)} &= \text{Span} \left\{ \text{Mat}(\mathbf{a}_i) \in \mathbb{R}^{d \times d} : \mathbf{a}_i \text{ is the } i\text{th left singular vector of } \tilde{\mathcal{T}}_{(12)(3\dots k)}, i \in [r] \right\}, \\ \mathcal{RS}^{(r)} &= \text{Span} \left\{ \mathbf{b}_i \in \mathbb{R}^{d^{k-2}} : \mathbf{b}_i \text{ is the } i\text{th right singular vector of } \tilde{\mathcal{T}}_{(12)(3\dots k)}, i \in [r] \right\}. \end{aligned}$$

The noise-free version ( $\varepsilon = 0$ ) reduces to

$$\mathcal{LS}_0 = \text{Span} \left\{ \mathbf{u}_i^{\otimes 2} : i \in [r] \right\}, \quad \text{and} \quad \mathcal{RS}_0 = \text{Span} \left\{ \text{Vec}(\mathbf{u}_i^{\otimes (k-2)}) : i \in [r] \right\}.$$

*Remark C.8.* We make the convention that the elements in  $\mathcal{LS}^{(r)}$  (respectively,  $\mathcal{LS}_0$ ) are viewed as  $d$ -by- $d$  matrices, while the elements in  $\mathcal{RS}^{(r)}$  (respectively,  $\mathcal{RS}_0$ ) are viewed as length- $d^{k-2}$  vectors. For g of notation, we drop the subscript  $r$  from  $\mathcal{LS}^{(r)}$  (respectively,  $\mathcal{RS}^{(r)}$ ) and simply write  $\mathcal{LS}$  (respectively,  $\mathcal{RS}$ ) hereafter.

**Definition C.9** (Inner-Product). For any two tensors  $\mathcal{A} = \llbracket a_{i_1 \dots i_k} \rrbracket$ ,  $\mathcal{B} = \llbracket b_{i_1 \dots i_k} \rrbracket \in \mathbb{R}^{d_1 \times \dots \times d_k}$  of identical order and dimensions, their inner product is defined as

$$\langle \mathcal{A}, \mathcal{B} \rangle = \sum_{i_1, \dots, i_k} a_{i_1 \dots i_k} b_{i_1 \dots i_k},$$

while the tensor Frobenius norm of  $\mathcal{A}$  is defined as

$$\|\mathcal{A}\|_F = \sqrt{\langle \mathcal{A}, \mathcal{A} \rangle} = \sqrt{\sum_{i_1, \dots, i_k} |a_{i_1 \dots i_k}|^2},$$

both of which are analogues of standard definitions for vectors and matrices.

**Lemma C.10.** For every matrix  $\mathbf{M} \in \mathcal{LS}$  satisfying  $\|\mathbf{M}\|_F = 1$ , there exists a unit vector  $\mathbf{b}_M \in \mathcal{RS}$  such that

$$\mathbf{M} = c \tilde{\mathcal{T}}_{(1)(2)(3\dots k)}(\mathbf{I}, \mathbf{I}, \mathbf{b}_M), \quad (10)$$

where  $c = 1 / \left\| \tilde{\mathcal{T}}_{(1)(2)(3\dots k)}(\mathbf{I}, \mathbf{I}, \mathbf{b}_M) \right\|_F$  is a normalizing constant.

*Proof.* Let  $\tilde{\mathcal{T}}_{(12)(3\dots k)} = \sum_i \mu_i \mathbf{a}_i \mathbf{b}_i^T$  denote the two-mode HOSVD. Following a similar line of argument as in the proof of Proposition 4.2, we have  $\mu_r \geq \lambda_{\min} - \|\mathcal{E}_{(12)(3\dots k)}\|_\sigma > 0$ . By the property of matrix SVD,

$$\mathbf{a}_i = \frac{1}{\mu_i} \tilde{\mathcal{T}}_{(12)(3\dots k)} \mathbf{b}_i, \quad \text{for all } i \in [r],$$

which implies

$$\text{Mat}(\mathbf{a}_i) = \frac{1}{\mu_i} \tilde{\mathcal{T}}_{(1)(2)(3\dots k)}(\mathbf{I}, \mathbf{I}, \mathbf{b}_i), \quad \text{for all } i \in [r].$$

Recall that  $\mathcal{LS} = \text{Span}\{\text{Mat}(\mathbf{a}_i) : i \in [r]\}$ . Thus, for any  $\mathbf{M} \in \mathcal{LS}$ , there exist coefficients  $\{\alpha_i\}_{i \in [r]}$  such that

$$\begin{aligned} \mathbf{M} &= \alpha_1 \text{Mat}(\mathbf{a}_1) + \dots + \alpha_r \text{Mat}(\mathbf{a}_r) \\ &= \frac{\alpha_1}{\mu_1} \tilde{\mathcal{T}}_{(1)(2)(3\dots k)}(\mathbf{I}, \mathbf{I}, \mathbf{b}_1) + \dots + \frac{\alpha_r}{\mu_r} \tilde{\mathcal{T}}_{(1)(2)(3\dots k)}(\mathbf{I}, \mathbf{I}, \mathbf{b}_r) \\ &= \tilde{\mathcal{T}}_{(1)(2)(3\dots k)} \left( \mathbf{I}, \mathbf{I}, \frac{\alpha_1}{\mu_1} \mathbf{b}_1 + \dots + \frac{\alpha_r}{\mu_r} \mathbf{b}_r \right), \end{aligned}$$

where the last line follows from the multilinearity of  $\tilde{\mathcal{T}}_{(1)(2)(3\dots k)}$ . Now define  $\mathbf{b}'_M = \frac{\alpha_1}{\mu_1} \mathbf{b}_1 + \dots + \frac{\alpha_r}{\mu_r} \mathbf{b}_r$ . The conclusion (10) then follows by setting  $\mathbf{b}_M = \mathbf{b}'_M / \|\mathbf{b}'_M\|_2 \in \mathcal{RS}$ .  $\square$

**Lemma C.11** (Perturbation of  $\mathcal{RS}_0$ ). Under Assumption 4.1,

$$\min_{\mathbf{b} \in \mathcal{RS}, \|\mathbf{b}\|_2=1} \left\| \mathbf{b} \Big|_{\mathcal{RS}_0} \right\|_2 \geq 1 - \frac{d^{k-2}}{2\lambda_{\min}^2} \varepsilon^2 + o(\varepsilon^2).$$

where  $\mathbf{b} \Big|_{\mathcal{RS}_0}$  denotes the vector projection of  $\mathbf{b} \in \mathcal{RS}$  onto the space  $\mathcal{RS}_0$ .

*Proof.* As seen in the proof of Proposition 4.2,  $\tilde{\mathcal{T}}_{(12)(3\dots k)}$  can be written as

$$\tilde{\mathcal{T}}_{(12)(3\dots k)} = \sum_{i=1}^r \lambda_i \text{Vec}(\mathbf{u}_i^{\otimes 2}) \text{Vec}(\mathbf{u}_i^{\otimes (k-2)})^T + \mathcal{E}_{(12)(3\dots k)}, \quad \text{where } \|\mathcal{E}_{(12)(3\dots k)}\|_\sigma \leq d^{(k-2)/2} \varepsilon. \quad (11)$$

The noise-free version of (11) reduces to

$$\mathcal{T}_{(12)(3\dots k)} = \sum_{i=1}^r \lambda_i \text{Vec}(\mathbf{u}_i^{\otimes 2}) \text{Vec}(\mathbf{u}_i^{\otimes (k-2)})^T.$$

Following the notation of Corollary C.5, we set  $\tilde{\mathbf{B}} = \tilde{\mathcal{T}}_{(12)(3\dots k)}$ ,  $\mathbf{B} = \mathcal{T}_{(12)(3\dots k)}$ ,  $\mathbf{\Sigma}_1 = \text{diag}\{\lambda_1, \dots, \lambda_r\}$ ,  $\mathbf{\Sigma}_2 = \text{diag}\{0, \dots, 0\}$ , and  $\Delta = \min\{\sigma_{\min}(\mathbf{\Sigma}_1), \sigma_{\min}(\mathbf{\Sigma}_1) - \sigma_{\max}(\mathbf{\Sigma}_2)\} = \min_{i \in [r]} \lambda_i$ . Then,  $\|\tilde{\mathbf{B}} - \mathbf{B}\|_\sigma = \|\mathcal{E}_{(12)(3\dots k)}\|_\sigma$ . By Assumption 4.1,  $\Delta = \lambda_{\min} > 2d^{(k-2)/2} \varepsilon > \|\mathcal{E}_{(12)(3\dots k)}\|_\sigma$ . Hence the condition of Corollary C.5 holds. Applying Corollary C.5 then yields

$$\begin{aligned} \sin \Theta(\mathcal{RS}_0, \mathcal{RS}) &\leq \frac{\|\mathcal{E}_{(12)(3\dots k)}\|_\sigma}{\lambda_{\min} - \|\mathcal{E}_{(12)(3\dots k)}\|_\sigma} = \frac{\|\mathcal{E}_{(12)(3\dots k)}\|_\sigma}{\lambda_{\min}} \left[ 1 - \frac{\|\mathcal{E}_{(12)(3\dots k)}\|_\sigma}{\lambda_{\min}} \right]^{-1} \\ &\leq \frac{d^{(k-2)/2} \varepsilon}{\lambda_{\min}} \left[ 1 - \frac{d^{(k-2)/2} \varepsilon}{\lambda_{\min}} \right]^{-1} = \frac{d^{(k-2)/2}}{\lambda_{\min}} \varepsilon + o(\varepsilon). \end{aligned} \quad (12)$$

Now let  $\mathbf{b} \in \mathcal{RS}$  be a unit vector. Decompose  $\mathbf{b}$  into

$$\mathbf{b} = \mathbf{b}|_{\mathcal{RS}_0} + \mathbf{b}|_{\mathcal{RS}_0^\perp},$$

where  $\mathbf{b}|_{\mathcal{RS}_0}$  and  $\mathbf{b}|_{\mathcal{RS}_0^\perp}$  are vector projections of  $\mathbf{b}$  onto the spaces  $\mathcal{RS}_0$  and  $\mathcal{RS}_0^\perp$ , respectively. By (12) and Taylor expansion,

$$\left\| \mathbf{b}|_{\mathcal{RS}_0} \right\|_2 = \cos \Theta(\mathbf{b}, \mathcal{RS}_0) = [1 - \sin^2 \Theta(\mathbf{b}, \mathcal{RS}_0)]^{1/2} \geq 1 - \frac{d^{k-2}}{2\lambda_{\min}^2} \varepsilon^2 + o(\varepsilon^2).$$

Since the above holds for every unit vector  $\mathbf{b} \in \mathcal{RS}$ , we conclude

$$\min_{\mathbf{b} \in \mathcal{RS}, \|\mathbf{b}\|_2=1} \left\| \mathbf{b}|_{\mathcal{RS}_0} \right\|_2 \geq 1 - \frac{d^{k-2}}{2\lambda_{\min}^2} \varepsilon^2 + o(\varepsilon^2).$$

□

**Corollary C.12.** *Under Assumption 4.1,*

$$\min_{\mathbf{b} \in \mathcal{RS}, \|\mathbf{b}\|_2=1} \left\| \mathbf{b}|_{\mathcal{RS}_0} \right\|_2 \geq 1 - \frac{1}{(c_0 - 1)^2},$$

which is  $\geq 0.98$  for  $c_0 \geq 10$ .

*Proof.* Note that  $\frac{\|\mathcal{E}_{(12)(3\dots k)}\|_\sigma}{\lambda_{\min}} \leq \frac{1}{c_0}$  by Assumption 4.1. The right-hand side of (12) can be bounded as follows,

$$\frac{\|\mathcal{E}_{(12)(3\dots k)}\|_\sigma}{\lambda_{\min} - \|\mathcal{E}_{(12)(3\dots k)}\|_\sigma} \leq \frac{1}{c_0 - 1}.$$

By a similar argument as in the proof of Lemma C.11, we obtain

$$\min_{\mathbf{b} \in \mathcal{RS}, \|\mathbf{b}\|_2=1} \left\| \mathbf{b}|_{\mathcal{RS}_0} \right\|_2 = \cos \Theta(\mathbf{b}, \mathcal{RS}_0) \geq \cos^2 \Theta(\mathbf{b}, \mathcal{RS}_0) \geq \cos^2 \Theta(\mathcal{RS}, \mathcal{RS}_0) \geq 1 - \frac{1}{(c_0 - 1)^2}, \quad (13)$$

which is the desired result. □

*Proof of Theorem 4.4.* To prove the upper bound in Theorem 4.4, it suffices to show that for every matrix  $\mathbf{M} \in \mathcal{LS}$  satisfying  $\|\mathbf{M}\|_F = 1$ , there exist coefficients  $\{\alpha_i \in \mathbb{R}\}_{i=1}^r$  such that

$$\mathbf{M} = \sum_{i=1}^r \alpha_i \mathbf{u}_i^{\otimes 2} + \mathbf{E}, \quad \text{where } \|\mathbf{E}\|_\sigma \leq \frac{d^{(k-3)/2}}{\lambda_{\min}} \varepsilon + o(\varepsilon). \quad (14)$$

Let  $\mathbf{M}$  be a  $d$ -by- $d$  matrix satisfying  $\mathbf{M} \in \mathcal{LS}$  and  $\|\mathbf{M}\|_F = 1$ . By Lemma C.10, there exists  $\mathbf{b}_M \in \mathcal{RS}$  such that

$$\begin{aligned} \mathbf{M} &= \frac{\tilde{\mathcal{T}}_{(1)(2)(3\dots k)}(\mathbf{I}, \mathbf{I}, \mathbf{b}_M)}{\left\| \tilde{\mathcal{T}}_{(1)(2)(3\dots k)}(\mathbf{I}, \mathbf{I}, \mathbf{b}_M) \right\|_F} \\ &= \sum_{i=1}^r \frac{\lambda_i \langle \text{Vec}(\mathbf{u}_i^{\otimes (k-2)}), \mathbf{b}_M \rangle}{\left\| \tilde{\mathcal{T}}_{(1)(2)(3\dots k)}(\mathbf{I}, \mathbf{I}, \mathbf{b}_M) \right\|_F} \mathbf{u}_i^{\otimes 2} + \frac{\mathcal{E}_{(1)(2)(3\dots k)}(\mathbf{I}, \mathbf{I}, \mathbf{b}_M)}{\left\| \tilde{\mathcal{T}}_{(1)(2)(3\dots k)}(\mathbf{I}, \mathbf{I}, \mathbf{b}_M) \right\|_F}. \end{aligned} \quad (15)$$

We now claim that (15) is a desired decomposition that satisfies (14). Namely, we seek to prove

$$\frac{\|\mathcal{E}_{(1)(2)(3\dots k)}(\mathbf{I}, \mathbf{I}, \mathbf{b}_M)\|_\sigma}{\left\| \tilde{\mathcal{T}}_{(1)(2)(3\dots k)}(\mathbf{I}, \mathbf{I}, \mathbf{b}_M) \right\|_F} \leq \frac{d^{(k-3)/2}}{\lambda_{\min}} \varepsilon + o(\varepsilon). \quad (16)$$

Observe that by the triangle inequality,

$$\begin{aligned} \left\| \tilde{\mathcal{T}}_{(1)(2)(3\dots k)}(\mathbf{I}, \mathbf{I}, \mathbf{b}_M) \right\|_F &= \left\| \sum_{i=1}^r \lambda_i \langle \text{Vec}(\mathbf{u}_i^{\otimes(k-2)}), \mathbf{b}_M \rangle \mathbf{u}_i^{\otimes 2} + \mathcal{E}_{(1)(2)(3\dots k)}(\mathbf{I}, \mathbf{I}, \mathbf{b}_M) \right\|_F \\ &\geq \underbrace{\left\| \sum_{i=1}^r \lambda_i \langle \text{Vec}(\mathbf{u}_i^{\otimes(k-2)}), \mathbf{b}_M \rangle \mathbf{u}_i^{\otimes 2} \right\|_F}_{\text{Part I}} - \underbrace{\left\| \mathcal{E}_{(1)(2)(3\dots k)}(\mathbf{I}, \mathbf{I}, \mathbf{b}_M) \right\|_F}_{\text{Part II}}. \end{aligned} \quad (17)$$

By the orthogonality of  $\{\mathbf{u}_i\}_{i \in [r]}$ , Part I has a lower bound,

$$\begin{aligned} \left\| \sum_{i=1}^r \lambda_i \langle \text{Vec}(\mathbf{u}_i^{\otimes(k-2)}), \mathbf{b}_M \rangle \mathbf{u}_i^{\otimes 2} \right\|_F &\geq \lambda_{\min} \sqrt{\sum_{i=1}^r \langle \text{Vec}(\mathbf{u}_i^{\otimes(k-2)}), \mathbf{b}_M \rangle^2} \\ &= \lambda_{\min} \left\| \mathbf{b}_M|_{\mathcal{R}\mathcal{S}_0} \right\|_2. \end{aligned} \quad (18)$$

By the inequality between the Frobenius norm and the spectral norm for matrices, Part II has an upper bound,

$$\left\| \mathcal{E}_{(1)(2)(3\dots k)}(\mathbf{I}, \mathbf{I}, \mathbf{b}_M) \right\|_F \leq \sqrt{d} \left\| \mathcal{E}_{(1)(2)(3\dots k)}(\mathbf{I}, \mathbf{I}, \mathbf{b}_M) \right\|_{\sigma} \leq \sqrt{d} \left\| \mathcal{E}_{(1)(2)(3\dots k)} \right\|_{\sigma} \leq d^{(k-2)/2} \varepsilon, \quad (19)$$

where we have used the inequality [2] that

$$\left\| \mathcal{E}_{(1)(2)(3\dots k)} \right\|_{\sigma} \leq d^{(k-3)/2} \left\| \mathcal{E} \right\|_{\sigma}. \quad (20)$$

Combining (17), (18) and (19) gives

$$\left\| \tilde{\mathcal{T}}_{(1)(2)(3\dots k)}(\mathbf{I}, \mathbf{I}, \mathbf{b}_M) \right\|_F \geq \lambda_{\min} \left[ \left\| \mathbf{b}_M|_{\mathcal{R}\mathcal{S}_0} \right\|_2 - \frac{d^{(k-2)/2} \varepsilon}{\lambda_{\min}} \right]. \quad (21)$$

By Corollary C.12 and Assumption 4.1 with  $c_0 \geq 10$ ,  $\left\| \mathbf{b}_M|_{\mathcal{R}\mathcal{S}_0} \right\|_2 - \frac{d^{(k-2)/2} \varepsilon}{\lambda_{\min}} \geq 0.98 - 0.1 > 0$ . So the right-hand side of (21) is strictly positive. Taking the reciprocal of (21) and combining it with (20), we obtain

$$\begin{aligned} \frac{\left\| \mathcal{E}_{(1)(2)(3\dots k)}(\mathbf{I}, \mathbf{I}, \mathbf{b}_M) \right\|_{\sigma}}{\left\| \tilde{\mathcal{T}}_{(1)(2)(3\dots k)}(\mathbf{I}, \mathbf{I}, \mathbf{b}_M) \right\|_F} &\leq \frac{d^{(k-3)/2} \varepsilon}{\lambda_{\min}} \left[ \left\| \mathbf{b}_M|_{\mathcal{R}\mathcal{S}_0} \right\|_{\sigma} - \frac{d^{(k-2)/2} \varepsilon}{\lambda_{\min}} \right]^{-1} \\ &\leq \frac{d^{(k-3)/2} \varepsilon}{\lambda_{\min}} \left[ 1 - o(\varepsilon) - \frac{d^{(k-2)/2} \varepsilon}{\lambda_{\min}} \right]^{-1} = \frac{d^{(k-3)/2}}{\lambda_{\min}} \varepsilon + o(\varepsilon), \end{aligned} \quad (22)$$

where the second line follows from Lemma C.11. This completes the proof of (16) and therefore (14). Since (14) holds for every  $\mathbf{M} \in \mathcal{L}\mathcal{S}$  that satisfies  $\|\mathbf{M}\|_F = 1$ , and  $\sum_{i=1}^r \alpha_i \mathbf{u}_i^{\otimes 2} \in \mathcal{L}\mathcal{S}_0$ , we immediately have

$$\max_{\mathbf{M} \in \mathcal{L}\mathcal{S}, \|\mathbf{M}\|_F = 1} \min_{\mathbf{M}^* \in \mathcal{L}\mathcal{S}_0} \|\mathbf{M} - \mathbf{M}^*\|_{\sigma} \leq \frac{d^{(k-3)/2}}{\lambda_{\min}} \varepsilon + o(\varepsilon).$$

□

*Remark C.13.* In addition to (14),  $\mathbf{M}$  can also be decomposed into

$$\mathbf{M} = \sum_{i=1}^r \alpha_i \mathbf{u}_i^{\otimes 2} + \mathbf{E}', \quad \text{where} \quad \|\mathbf{E}'\|_{\sigma} \leq \frac{2d^{(k-3)/2}}{\lambda_{\min}} \varepsilon + o(\varepsilon),$$

where  $\mathbf{E}'$  satisfies

$$\langle \mathbf{E}', \mathbf{u}_i^{\otimes 2} \rangle = 0 \quad \text{for all } i \in [r].$$

To see this, rewrite (14) as

$$\begin{aligned} \mathbf{M} &= \sum_{i=1}^r \alpha_i \mathbf{u}_i^{\otimes 2} + \mathbf{E} = \sum_{i=1}^r \alpha_i \mathbf{u}_i^{\otimes 2} + \sum_{i=1}^r \langle \mathbf{E}, \mathbf{u}_i^{\otimes 2} \rangle \mathbf{u}_i^{\otimes 2} + \mathbf{E} - \sum_{i=1}^r \langle \mathbf{E}, \mathbf{u}_i^{\otimes 2} \rangle \mathbf{u}_i^{\otimes 2} \\ &= \underbrace{\sum_{i=1}^r (\alpha_i + \langle \mathbf{E}, \mathbf{u}_i^{\otimes 2} \rangle) \mathbf{u}_i^{\otimes 2}}_{\in \mathcal{LS}_0} + \underbrace{\mathbf{E} - \sum_{i=1}^r \langle \mathbf{E}, \mathbf{u}_i^{\otimes 2} \rangle \mathbf{u}_i^{\otimes 2}}_{=: \mathbf{E}'}. \end{aligned}$$

By construction,  $\mathbf{E}'$  satisfies

$$\begin{aligned} \langle \mathbf{E}', \mathbf{u}_i^{\otimes 2} \rangle &= \langle \mathbf{E} - \sum_{j=1}^r \langle \mathbf{E}, \mathbf{u}_j^{\otimes 2} \rangle \mathbf{u}_j^{\otimes 2}, \mathbf{u}_i^{\otimes 2} \rangle \\ &= \langle \mathbf{E}, \mathbf{u}_i^{\otimes 2} \rangle - \sum_{j=1}^r \langle \mathbf{E}, \mathbf{u}_j^{\otimes 2} \rangle \langle \mathbf{u}_j^{\otimes 2}, \mathbf{u}_i^{\otimes 2} \rangle \\ &= \langle \mathbf{E}, \mathbf{u}_i^{\otimes 2} \rangle - \sum_{j=1}^r \langle \mathbf{E}, \mathbf{u}_j^{\otimes 2} \rangle \delta_{ij} \\ &= 0. \end{aligned}$$

Moreover,

$$\begin{aligned} \|\mathbf{E}'\|_\sigma &\leq \|\mathbf{E}\|_\sigma + \left\| \sum_{i=1}^r \langle \mathbf{E}, \mathbf{u}_i^{\otimes 2} \rangle \mathbf{u}_i^{\otimes 2} \right\|_\sigma \\ &\leq \|\mathbf{E}\|_\sigma + \max_i |\langle \mathbf{E}, \mathbf{u}_i^{\otimes 2} \rangle| \\ &\leq 2 \|\mathbf{E}\|_\sigma \\ &\leq \frac{2d^{(k-3)/2}}{\lambda_{\min}} \varepsilon + o(\varepsilon), \end{aligned}$$

where the first line follows from the triangle inequality and the second lines follows from the orthogonality of  $\{\mathbf{u}_i\}_{i \in [r]}$ .

**Corollary C.14.** *Under Assumption 4.1,*

$$\max_{\mathbf{M} \in \mathcal{LS}, \|\mathbf{M}\|_F=1} \min_{\mathbf{M}^* \in \mathcal{LS}_0} \|\mathbf{M} - \mathbf{M}^*\|_\sigma \leq \frac{1.13}{c_0},$$

which is  $\leq 0.12$  for  $c_0 \geq 10$ .

*Proof.* By Corollary C.12, the right-hand side of (22) has the following upper bound,

$$\frac{d^{(k-3)/2} \varepsilon}{\lambda_{\min}} \left[ \left\| \mathbf{b}_M|_{\mathcal{RS}_0} \right\|_\sigma - \frac{d^{(k-2)/2} \varepsilon}{\lambda_{\min}} \right]^{-1} \leq \frac{1}{\sqrt{d} c_0} \left[ 1 - \frac{1}{(c_0 - 1)^2} - \frac{1}{c_0} \right]^{-1} \leq \frac{1.13}{c_0} \leq 0.12.$$

The claim then follows from the same argument as in the proof of Theorem 4.4.  $\square$

**Corollary C.15.** *Suppose  $c_0 \geq 10$  in Assumption 4.1. In the notation of (14), we have*

$$\max_{i \in [r]} |\alpha_i| \leq 1 + \frac{1.13}{c_0} \leq 1.12.$$

*Proof.* By the triangle inequality and Corollary C.14,

$$\max_{i \in [r]} |\alpha_i| \leq \sqrt{\sum_{i=1}^r |\alpha_i|^2} = \|\mathbf{M} - \mathbf{E}\|_F \leq \|\mathbf{M}\|_F + \|\mathbf{E}\|_F \leq 1 + \frac{1.13}{c_0} = 1.12. \quad \square$$



## C.4 Perturbation Bounds

### C.4.1 Proof of Lemma 4.5

*Proof of Lemma 4.5.* We prove by construction. Define  $\mathbf{M}_i = \mathbf{u}_i^{\otimes 2} \in \mathcal{LS}_0$  for  $i \in [r]$ , and project  $\mathbf{M}_i$  onto the space  $\mathcal{LS}$ ,

$$\mathbf{M}_i = \mathbf{M}_i|_{\mathcal{LS}} + \mathbf{M}_i|_{\mathcal{LS}^\perp}, \quad (23)$$

where  $\mathbf{M}_i|_{\mathcal{LS}}$  and  $\mathbf{M}_i|_{\mathcal{LS}^\perp}$  denote the projections of  $\mathbf{M}_i \in \mathcal{LS}_0$  onto the vector space  $\mathcal{LS}$  and  $\mathcal{LS}^\perp$ , respectively. We seek to show that the set of matrices  $\{\mathbf{M}_i|_{\mathcal{LS}} : i \in [r]\}$  satisfies

$$\frac{\|\mathbf{M}_i|_{\mathcal{LS}}\|_\sigma}{\|\mathbf{M}_i|_{\mathcal{LS}}\|_F} \geq 1 - \frac{d^{(k-2)/2}}{\lambda_{\min}} \varepsilon + o(\varepsilon), \quad \text{for all } i \in [r]. \quad (24)$$

Applying the subadditivity of spectral norm to (23) gives

$$\begin{aligned} \|\mathbf{M}_i|_{\mathcal{LS}}\|_\sigma &\geq \|\mathbf{M}_i\|_\sigma - \|\mathbf{M}_i|_{\mathcal{LS}^\perp}\|_\sigma \\ &\geq 1 - \|\mathbf{M}_i|_{\mathcal{LS}^\perp}\|_F = 1 - \sin \Theta(\mathbf{M}_i, \mathcal{LS}) \|\mathbf{M}_i\|_F \\ &\geq 1 - \sin \Theta(\mathcal{LS}_0, \mathcal{LS}), \end{aligned} \quad (25)$$

where the second line comes from  $\|\mathbf{M}_i\|_\sigma = \|\mathbf{M}_i\|_F = 1$ ,  $\|\mathbf{M}_i|_{\mathcal{LS}^\perp}\|_\sigma \leq \|\mathbf{M}_i|_{\mathcal{LS}^\perp}\|_F$ , and the last line comes from Proposition C.3. By following the same line of argument in Lemma C.11, we have

$$\sin \Theta(\mathcal{LS}_0, \mathcal{LS}) \leq \frac{\|\mathcal{E}_{(12)(3\dots k)}\|_\sigma}{\lambda_{\min} - \|\mathcal{E}_{(12)(3\dots k)}\|_\sigma} \leq \frac{d^{(k-2)/2}}{\lambda_{\min}} \varepsilon + o(\varepsilon). \quad (26)$$

Combining (25) and (26) leads to

$$\|\mathbf{M}_i|_{\mathcal{LS}}\|_\sigma \geq 1 - \frac{d^{(k-2)/2}}{\lambda_{\min}} \varepsilon + o(\varepsilon).$$

By construction,  $\|\mathbf{M}_i|_{\mathcal{LS}}\|_F \leq \|\mathbf{M}_i\|_F = 1$ , and therefore (24) is proved. Note that  $\mathbf{M}_i|_{\mathcal{LS}} \in \mathcal{LS}$  for all  $i \in [r]$ . Hence,

$$\max_{\mathbf{M} \in \mathcal{LS}} \frac{\|\mathbf{M}\|_\sigma}{\|\mathbf{M}\|_F} \geq \frac{\|\mathbf{M}_i|_{\mathcal{LS}}\|_\sigma}{\|\mathbf{M}_i|_{\mathcal{LS}}\|_F} \geq 1 - \frac{d^{(k-2)/2}}{\lambda_{\min}} \varepsilon + o(\varepsilon). \quad (27)$$

The conclusion then follows by the equivalence

$$\max_{\mathbf{M} \in \mathcal{LS}} \frac{\|\mathbf{M}\|_\sigma}{\|\mathbf{M}\|_F} = \max_{\mathbf{M} \in \mathcal{LS}, \|\mathbf{M}\|_F=1} \|\mathbf{M}\|_\sigma.$$

□

*Remark C.16.* The above proof reveals that there are at least  $r$  elements  $\mathbf{M}_i|_{\mathcal{LS}}$  in  $\mathcal{LS}$  that satisfy the right-hand side of (27). These  $r$  elements are linearly independent, and in fact,  $\{\mathbf{M}_i|_{\mathcal{LS}}\}_{i \in [r]}$  are approximately orthogonal to each other. To see this, we bound  $\cos \Theta(\mathbf{M}_i|_{\mathcal{LS}}, \mathbf{M}_j|_{\mathcal{LS}})$  for all  $i, j \in [r]$ , with  $i \neq j$ . Recall that  $\{\mathbf{M} \stackrel{\text{def}}{=} \mathbf{u}_i^{\otimes 2}\}_{i \in [r]}$  is a set of mutually orthogonal vectors in  $\mathcal{LS}_0$ . Then for all  $i \neq j$ ,

$$\begin{aligned} 0 &= \langle \mathbf{M}_i, \mathbf{M}_j \rangle = \langle \mathbf{M}_i|_{\mathcal{LS}} + \mathbf{M}_i|_{\mathcal{LS}^\perp}, \mathbf{M}_j|_{\mathcal{LS}} + \mathbf{M}_j|_{\mathcal{LS}^\perp} \rangle \\ &= \langle \mathbf{M}_i|_{\mathcal{LS}}, \mathbf{M}_j|_{\mathcal{LS}} \rangle + \langle \mathbf{M}_i|_{\mathcal{LS}^\perp}, \mathbf{M}_j|_{\mathcal{LS}^\perp} \rangle, \end{aligned} \quad (28)$$

which implies  $\langle \mathbf{M}_i|_{\mathcal{LS}}, \mathbf{M}_j|_{\mathcal{LS}} \rangle = -\langle \mathbf{M}_i|_{\mathcal{LS}^\perp}, \mathbf{M}_j|_{\mathcal{LS}^\perp} \rangle$ . Hence,

$$|\cos \Theta(\mathbf{M}_i|_{\mathcal{LS}}, \mathbf{M}_j|_{\mathcal{LS}})| = \frac{|\langle \mathbf{M}_i|_{\mathcal{LS}}, \mathbf{M}_j|_{\mathcal{LS}} \rangle|}{\|\mathbf{M}_i|_{\mathcal{LS}}\|_F \|\mathbf{M}_j|_{\mathcal{LS}}\|_F}$$

$$\begin{aligned}
&= \frac{|\langle \mathbf{M}_i|_{\mathcal{L}\mathcal{S}^\perp}, \mathbf{M}_j|_{\mathcal{L}\mathcal{S}^\perp} \rangle|}{\|\mathbf{M}_i|_{\mathcal{L}\mathcal{S}}\|_F \|\mathbf{M}_j|_{\mathcal{L}\mathcal{S}}\|_F} \\
&\leq \frac{\|\mathbf{M}_i|_{\mathcal{L}\mathcal{S}^\perp}\|_F}{\|\mathbf{M}_i|_{\mathcal{L}\mathcal{S}}\|_F} \times \frac{\|\mathbf{M}_j|_{\mathcal{L}\mathcal{S}^\perp}\|_F}{\|\mathbf{M}_j|_{\mathcal{L}\mathcal{S}}\|_F} \\
&\leq \tan^2 \Theta(\mathcal{L}\mathcal{S}_0, \mathcal{L}\mathcal{S}),
\end{aligned}$$

where the second line comes from (28), the third line comes from Cauchy-Schwarz inequality and the last line uses the fact that  $\mathbf{M}_i, \mathbf{M}_j \in \mathcal{L}\mathcal{S}_0$ . Following the similar argument as in Corollary C.12 (in particular, the last inequality in (13)), we have  $|\sin \Theta(\mathcal{L}\mathcal{S}_0, \mathcal{L}\mathcal{S})| \leq \frac{1}{c_0 - 1} \leq 0.12$  under the assumption  $c_0 \geq 10$ . Thus,

$$|\cos \Theta(\mathbf{M}_i|_{\mathcal{L}\mathcal{S}}, \mathbf{M}_j|_{\mathcal{L}\mathcal{S}})| \leq \tan^2 \Theta(\mathcal{L}\mathcal{S}_0, \mathcal{L}\mathcal{S}) \leq 0.015.$$

This implies  $89.2^\circ \leq \Theta(\mathbf{M}_i|_{\mathcal{L}\mathcal{S}}, \mathbf{M}_j|_{\mathcal{L}\mathcal{S}}) \leq 90.8^\circ$ ; that is,  $\{\mathbf{M}_i|_{\mathcal{L}\mathcal{S}}\}_{i \in [r]}$  are approximately orthogonal to each other.

**Corollary C.17.** *Suppose  $c_0 \geq 10$  in Assumption 4.1. Then*

$$\max_{\mathbf{M} \in \mathcal{L}\mathcal{S}, \|\mathbf{M}\|_F=1} \|\mathbf{M}\|_\sigma \geq 1 - \frac{1}{c_0 - 1} \geq 0.88.$$

*Proof.* As seen in Corollary C.12,

$$\sin \Theta(\mathcal{L}\mathcal{S}_0, \mathcal{L}\mathcal{S}) \leq \frac{\|\mathcal{E}_{(12)(3\dots k)}\|_\sigma}{\lambda_{\min} - \|\mathcal{E}_{(12)(3\dots k)}\|_\sigma} \leq \frac{1}{c_0 - 1}.$$

Combining this with (25) and (26) gives

$$\|\mathbf{M}_i|_{\mathcal{L}\mathcal{S}}\|_\sigma \geq 1 - \sin \Theta(\mathcal{L}\mathcal{S}_0, \mathcal{L}\mathcal{S}) \geq 1 - \frac{1}{c_0 - 1} \geq 0.88.$$

The remaining argument is exactly the same as the above proof of Lemma 4.5.  $\square$

#### C.4.2 Proof of Lemma 4.6

*Proof of Lemma 4.6.* Because of the symmetry of  $\tilde{\mathcal{T}}$  and Lemma C.10,  $\widehat{\mathbf{M}}_1$  must be a symmetric matrix. Now let  $\widehat{\mathbf{M}}_1 = \sum_{i=1}^d \gamma_i \mathbf{x}_i \mathbf{x}_i^T$  denote the eigen-decomposition of  $\widehat{\mathbf{M}}_1$ , where  $\gamma_i$  is sorted in decreasing order and  $\mathbf{x}_i \in \mathbb{R}^d$  is the eigenvector corresponding to  $\gamma_i$  for all  $i \in [d]$ . Without loss of generality, we assume  $\gamma_1 > 0$ . By construction,  $\widehat{\mathbf{M}}_1 = \arg \max_{\mathbf{M} \in \mathcal{L}\mathcal{S}, \|\mathbf{M}\|_F=1} \|\mathbf{M}\|_\sigma$ . By Lemma 4.5,

$$\gamma_1 = \|\widehat{\mathbf{M}}_1\|_\sigma \geq 1 - \frac{d^{(k-2)/2}}{\lambda_{\min}} \varepsilon + o(\varepsilon).$$

Since  $\sum_i \gamma_i^2 = \|\widehat{\mathbf{M}}_1\|_F^2 = 1$ ,  $|\gamma_2| \leq (1 - \gamma_1^2)^{1/2} \leq \frac{\sqrt{2}d^{(k-2)/4}}{\sqrt{\lambda_{\min}}} \sqrt{\varepsilon} + o(\sqrt{\varepsilon})$ . Define  $\Delta := \min\{\gamma_1, \gamma_1 - \gamma_2\}$ . Then,

$$\Delta \geq \gamma_1 - |\gamma_2| \geq 1 - \frac{\sqrt{2}d^{(k-2)/4}}{\sqrt{\lambda_{\min}}} \sqrt{\varepsilon} + o(\sqrt{\varepsilon}).$$

Under the assumption  $c_0 \geq 10$ ,  $\gamma_1 \geq 0.88$  by Corollary C.17. Hence,  $\Delta \geq \gamma_1 - |\gamma_2| \geq 0.88 - \sqrt{1 - 0.88^2} \approx 0.41 > 0$ .

By Theorem 4.4, there exists  $\mathbf{M}^* = \sum_{i=1}^r \alpha_i \mathbf{u}_i^{\otimes 2} \in \mathcal{L}\mathcal{S}_0$  such that

$$\|\widehat{\mathbf{M}}_1 - \mathbf{M}^*\|_\sigma \leq \frac{d^{(k-3)/2}}{\lambda_{\min}} \varepsilon + o(\varepsilon).$$

Without loss of generality, suppose the dominant eigenvector of  $\mathbf{M}^*$  is  $\mathbf{u}_1$ . Following the notation of Corollary C.5, we set  $\mathbf{B} = \widehat{\mathbf{M}}_1$ ,  $\widetilde{\mathbf{B}} = \mathbf{M}^*$ ,  $\mathbf{E} = \widehat{\mathbf{M}}_1 - \mathbf{M}^*$ ,  $\boldsymbol{\Sigma}_1 = \{\gamma_1\}$  and  $\boldsymbol{\Sigma}_2 = \text{diag}\{\gamma_2, \dots, \gamma_d\}$ . From Corollary C.14,  $\|\mathbf{E}\|_\sigma \leq 0.12$ . Combining this with earlier calculation, we have  $\Delta - \|\mathbf{E}\|_\sigma \geq 0.41 - 0.12 = 0.29 > 0$ . Hence, the condition in Corollary C.5 holds.

Applying Corollary C.5 to the specified setting yields

$$|\sin \Theta(\widehat{\mathbf{u}}_1, \mathbf{u}_1)| \leq \frac{\|\mathbf{E}\|_\sigma}{\Delta - \|\mathbf{E}\|_\sigma} \leq \frac{d^{(k-3)/2}}{\lambda_{\min}} \varepsilon \left[ 1 - \frac{\sqrt{2}d^{(k-2)/4}}{\sqrt{\lambda_{\min}}} \sqrt{\varepsilon} + o(\sqrt{\varepsilon}) \right]^{-1} = \frac{d^{(k-3)/2}}{\lambda_{\min}} \varepsilon + o(\varepsilon). \quad (29)$$

To bound  $\text{Loss}(\widehat{\mathbf{u}}_1, \mathbf{u}_1)$ , we notice that

$$\text{Loss}(\widehat{\mathbf{u}}_1, \mathbf{u}_1) = [2 - 2|\cos \Theta(\widehat{\mathbf{u}}_1, \mathbf{u}_1)|]^{1/2} = \left[ 2 - 2\sqrt{1 - \sin^2 \Theta(\widehat{\mathbf{u}}_1, \mathbf{u}_1)} \right]^{1/2}.$$

By Taylor expansion and (29), we conclude

$$\text{Loss}(\widehat{\mathbf{u}}_1, \mathbf{u}_1) \leq \frac{d^{(k-3)/2}}{\lambda_{\min}} \varepsilon + o(\varepsilon).$$

□

**Corollary C.18.** *Under Assumption 4.1,*

$$\text{Loss}(\widehat{\mathbf{u}}_1, \mathbf{u}_1) \leq \frac{5}{c_0},$$

which is  $\leq 0.5$  for  $c_0 \geq 10$ .

*Proof.* In the proof of Lemma 4.6, we have shown that  $\Delta - \|\mathbf{E}\|_\sigma \geq 0.29$ . By Corollary C.14,  $\|\mathbf{E}\|_\sigma \leq 1.13/c_0$ . Therefore, (29) has the following upper bound,

$$|\sin \Theta(\widehat{\mathbf{u}}_1, \mathbf{u}_1)| \leq \frac{\|\mathbf{E}\|_\sigma}{\Delta - \|\mathbf{E}\|_\sigma} \leq \frac{4}{c_0}.$$

Following the same argument as in the proof of Lemma 4.6, we obtain

$$\text{Loss}(\widehat{\mathbf{u}}_1, \mathbf{u}_1) = [2 - 2|\cos \Theta(\widehat{\mathbf{u}}_1, \mathbf{u}_1)|]^{1/2} \leq \frac{5}{c_0} \leq 0.5.$$

□

### C.4.3 Proof of Lemma 4.7

*Proof of Lemma 4.7.* For clarity, we use  $\widehat{\mathbf{M}}_1$  and  $\widehat{\mathbf{u}}_1$  to denote the estimators in line 5 of Algorithm 1, and use  $\widetilde{\mathbf{M}}_1^*$  and  $\widetilde{\mathbf{u}}_1^*$  to denote the estimators in line 6 of Algorithm 1. Namely,

$$\widehat{\mathbf{M}}_1^* = \widetilde{\mathcal{T}}(\mathbf{I}, \mathbf{I}, \widehat{\mathbf{u}}_1, \dots, \widehat{\mathbf{u}}_1), \quad \text{and} \quad \widetilde{\mathbf{u}}_1^* = \arg \max_{\mathbf{x} \in \mathcal{S}^{d-1}} |\mathbf{x}^T \widehat{\mathbf{M}}_1^* \mathbf{x}|.$$

By construction, the perturbation model of  $\widetilde{\mathcal{T}}$  implies the perturbation model of  $\widehat{\mathbf{M}}_1^*$ ,

$$\widehat{\mathbf{M}}_1^* = \sum_{i=1}^r \lambda_i \langle \widehat{\mathbf{u}}_1, \mathbf{u}_i \rangle^{(k-2)} \mathbf{u}_i^{\otimes 2} + \mathcal{E}(\mathbf{I}, \mathbf{I}, \widehat{\mathbf{u}}_1, \dots, \widehat{\mathbf{u}}_1),$$

where  $\|\mathcal{E}(\mathbf{I}, \mathbf{I}, \widehat{\mathbf{u}}_1, \dots, \widehat{\mathbf{u}}_1)\|_\sigma \leq \|\mathcal{E}\|_\sigma \leq \varepsilon$ .

Without loss of generality, assume  $\widehat{\mathbf{u}}_1$  is the estimator of  $\mathbf{u}_1$  and  $\langle \widehat{\mathbf{u}}_1, \mathbf{u}_1 \rangle > 0$ ; otherwise, we take  $-\widehat{\mathbf{u}}_1$  to be the estimator. Let  $\eta_i := \lambda_i \langle \widehat{\mathbf{u}}_1, \mathbf{u}_i \rangle^{(k-2)}$  for all  $i \in [r]$ . In the context of Corollary C.5, we set  $\mathbf{B} =$

$\sum_{i \in [r]} \eta_i \mathbf{u}_i^{\otimes 2}$ ,  $\tilde{\mathbf{B}} = \widehat{\mathbf{M}}^*$ ,  $\mathbf{E} = \tilde{\mathbf{B}} - \mathbf{B}$ ,  $\boldsymbol{\Sigma}_1 = \{\eta_1\}$ ,  $\boldsymbol{\Sigma}_2 = \text{diag}\{\eta_2, \dots, \eta_r\}$ , and  $\Delta = \min\{\eta_1, \eta_1 - \max_{i \neq 1} \eta_i\}$ . Then,

$$\Delta \geq \eta_1 - \max_{i \neq 1} |\eta_i| = \lambda_1 \langle \hat{\mathbf{u}}_1, \mathbf{u}_1 \rangle^{(k-2)} - \max_{i \neq 1} |\lambda_i \langle \hat{\mathbf{u}}_1, \mathbf{u}_1 \rangle|^{(k-2)}. \quad (30)$$

Note that  $\|\mathbf{E}\|_\sigma \leq \|\mathcal{E}\|_\sigma \leq \varepsilon$ . In order to apply Corollary C.5, we seek to show  $\Delta > \varepsilon$ .

By Definition 4.3, we have

$$\langle \hat{\mathbf{u}}_1, \mathbf{u}_1 \rangle = \cos \Theta(\hat{\mathbf{u}}_1, \mathbf{u}_1) = 1 - \frac{1}{2} \text{Loss}^2(\hat{\mathbf{u}}_1, \mathbf{u}_1), \quad (31)$$

and by the orthogonality of  $\{\mathbf{u}_i\}_{i \in [r]}$ ,

$$|\langle \hat{\mathbf{u}}_1, \mathbf{u}_i \rangle|^2 \leq \sum_{j=2}^r |\langle \hat{\mathbf{u}}_1, \mathbf{u}_j \rangle|^2 \leq 1 - \cos^2 \Theta(\hat{\mathbf{u}}_1, \mathbf{u}_1) = \text{Loss}^2(\hat{\mathbf{u}}_1, \mathbf{u}_1) \left[ 1 - \frac{1}{4} \text{Loss}^2(\hat{\mathbf{u}}_1, \mathbf{u}_1) \right], \quad (32)$$

for all  $i = 2, \dots, r$ .

Combining (31), (32),  $0 \leq \text{Loss}(\hat{\mathbf{u}}_1, \mathbf{u}_1) \leq 1/2$  (by Corollary C.18), and the fact that  $(1-x)^{(k-2)} \geq 1 - (k-2)x$  for all  $0 \leq x \leq 1$  and  $k \geq 3$ , we further have

$$\langle \hat{\mathbf{u}}_1, \mathbf{u}_1 \rangle^{(k-2)} = \left[ 1 - \frac{1}{2} \text{Loss}^2(\hat{\mathbf{u}}_1, \mathbf{u}_1) \right]^{(k-2)} \geq 1 - \frac{k-2}{2} \text{Loss}^2(\hat{\mathbf{u}}_1, \mathbf{u}_1) \geq 1 - \frac{k-2}{4} \text{Loss}(\hat{\mathbf{u}}_1, \mathbf{u}_1), \quad (33)$$

and

$$|\langle \hat{\mathbf{u}}_1, \mathbf{u}_i \rangle|^{(k-2)} \leq [\text{Loss}^2(\hat{\mathbf{u}}_1, \mathbf{u}_1)]^{(k-2)/2} = \text{Loss}^{k-2}(\hat{\mathbf{u}}_1, \mathbf{u}_1) \leq \text{Loss}(\hat{\mathbf{u}}_1, \mathbf{u}_1), \quad (34)$$

for all  $i = 2, \dots, r$ . Putting (33) and (34) back in (30), we obtain

$$\begin{aligned} \Delta &\geq \lambda_1 \left[ 1 - \frac{k-2}{4} \text{Loss}(\hat{\mathbf{u}}_1, \mathbf{u}_1) \right] - \lambda_{\max} \text{Loss}(\hat{\mathbf{u}}_1, \mathbf{u}_1) \\ &\geq \lambda_1 \left[ 1 - \left( \frac{k-2}{4} + \frac{\lambda_{\max}}{\lambda_{\min}} \right) \text{Loss}(\hat{\mathbf{u}}_1, \mathbf{u}_1) \right]. \end{aligned}$$

By Corollary C.18,  $\text{Loss}(\hat{\mathbf{u}}_1, \mathbf{u}_1) \leq 5/c_0$ . Write  $c := \frac{k-2}{4} + \frac{\lambda_{\max}}{\lambda_{\min}}$ . Under the assumption  $c_0 \geq \max\{10, 6c\}$ , we have  $\Delta \geq \lambda_1/6$  and hence

$$\Delta - \varepsilon \geq \frac{\lambda_1}{6} - \frac{\lambda_{\min}}{c_0 d^{(k-2)/2}} > \frac{\lambda_1}{6} - \frac{\lambda_{\min}}{10} > 0.$$

This implies that the condition in Corollary C.5 holds. Now applying Corollary C.5 to the specified setting gives

$$\begin{aligned} |\sin \Theta(\hat{\mathbf{u}}_1, \mathbf{u}_1)| &\leq \frac{\varepsilon}{\Delta - \varepsilon} \\ &\leq \frac{\varepsilon}{\lambda_1} \left[ 1 - c \text{Loss}(\hat{\mathbf{u}}_1, \mathbf{u}_1) - \frac{\varepsilon}{\lambda_1} \right]^{-1} \\ &\leq \frac{\varepsilon}{\lambda_1} \left[ 1 - \frac{cd^{(k-3)/2}\varepsilon}{\lambda_{\min}} - \frac{\varepsilon}{\lambda_1} + o(\varepsilon) \right]^{-1} = \frac{\varepsilon}{\lambda_1} + o(\varepsilon), \end{aligned}$$

where the third line follows from Lemma 4.6. Using the fact that  $\text{Loss}(\hat{\mathbf{u}}_1, \mathbf{u}_1) = [2 - 2|\cos \Theta(\hat{\mathbf{u}}_1, \mathbf{u}_1)|]^{1/2} = \left[ 2 - 2\sqrt{1 - \sin^2 \Theta(\hat{\mathbf{u}}_1, \mathbf{u}_1)} \right]^{1/2}$  and Taylor expansion, we conclude

$$\text{Loss}(\hat{\mathbf{u}}_1, \mathbf{u}_1) \leq \frac{\varepsilon}{\lambda_1} + o(\varepsilon).$$

To obtain  $\text{Loss}(\widehat{\lambda}_1, \lambda_1)$ , recall that under the assumption  $\langle \widehat{\mathbf{u}}_1, \mathbf{u}_1 \rangle > 0$ ,  $\text{Loss}(\widehat{\lambda}_1, \lambda_1) = |\widehat{\lambda}_1 - \lambda_1|$ . (Otherwise, we need to consider  $|\widehat{\lambda}_1 + \lambda_1|$  instead). Observe that by the triangle inequality,

$$\begin{aligned} |\widehat{\lambda}_1 - \lambda_1| &= |\mathcal{T}(\widehat{\mathbf{u}}_1, \dots, \widehat{\mathbf{u}}_1) - \lambda_1| = \left| \sum_{i=1}^r \lambda_i \langle \widehat{\mathbf{u}}_1, \mathbf{u}_i \rangle^k + \mathcal{E}(\widehat{\mathbf{u}}_1, \dots, \widehat{\mathbf{u}}_1) - \lambda_1 \right| \\ &\leq \lambda_1 |1 - \langle \widehat{\mathbf{u}}_1, \mathbf{u}_1 \rangle^k| + \sum_{i=2}^r \lambda_i |\langle \widehat{\mathbf{u}}_1, \mathbf{u}_i \rangle^k| + |\mathcal{E}(\widehat{\mathbf{u}}_1, \dots, \widehat{\mathbf{u}}_1)|. \end{aligned}$$

Using similar techniques as in (31), (32), (33) and (34), as well as the fact  $(1-x)^k \geq 1-kx$  for all  $0 \leq x \leq 1$  and  $k \geq 3$ , we conclude

$$\begin{aligned} |\widehat{\lambda}_1 - \lambda_1| &\leq \frac{\lambda_1 k}{2} \text{Loss}^2(\widehat{\mathbf{u}}_1, \mathbf{u}_1) + \lambda_{\max} \text{Loss}^2(\widehat{\mathbf{u}}_1, \mathbf{u}_1) + \varepsilon \\ &\leq \left( \frac{\lambda_1 k}{2} + \lambda_{\max} \right) \left[ \frac{\varepsilon}{\lambda_1} + o(\varepsilon) \right]^2 + \varepsilon \\ &= \varepsilon + o(\varepsilon). \end{aligned}$$

□

#### C.4.4 Proof of Lemma 4.8

*Proof of Lemma 4.8.* Let  $\mathbf{M}$  be a  $d$ -by- $d$  matrix in the space  $\mathcal{LS}(X) \stackrel{\text{def}}{=} \mathcal{LS} \cap \text{Span}\{\widehat{\mathbf{u}}_i^{\otimes 2} : i \in X\}^\perp$  and suppose  $\mathbf{M}$  satisfies  $\|\mathbf{M}\|_F = 1$ . Since  $\mathcal{LS}(X) \subset \mathcal{LS}$ , from Remark C.13,  $\mathbf{M}$  can be decomposed into

$$\mathbf{M} = \sum_{i=1}^r \alpha_i \mathbf{u}_i^{\otimes 2} + \mathbf{E}, \quad (35)$$

where

$$\langle \mathbf{E}, \mathbf{u}_i^{\otimes 2} \rangle = 0 \quad \text{for all } i \in [r], \quad \text{and} \quad \|\mathbf{E}\|_\sigma \leq \frac{2d^{(k-3)/2}\varepsilon}{\lambda_{\min}} + o(\varepsilon). \quad (36)$$

By definition, every element in  $\mathcal{LS}(X)$  is orthogonal to  $\text{Vec}(\widehat{\mathbf{u}}_i^{\otimes 2})$  for all  $i \in X$ . We claim that under this condition, one must have  $\alpha_i = o(\varepsilon)$  for all  $i \in X$ . To show this, we project  $\widehat{\mathbf{u}}_i$  onto the space  $\text{Span}\{\mathbf{u}_i\}$  and write

$$\widehat{\mathbf{u}}_i = \xi_i \mathbf{u}_i + \eta_i \mathbf{u}_i^\perp,$$

where  $\xi_i^2 + \eta_i^2 = 1$  and  $\mathbf{u}_i^\perp \in \mathbf{S}^{d-1}$  denotes the normalized (i.e., unit) vector projection of  $\widehat{\mathbf{u}}_i$  onto the space  $\text{Span}\{\mathbf{u}_i\}^\perp$ . Then for all  $i \in X$ ,

$$\begin{aligned} 0 &= \langle \mathbf{M}, \widehat{\mathbf{u}}_i^{\otimes 2} \rangle \\ &= \left\langle \sum_{j \in [r]} \alpha_j \mathbf{u}_j^{\otimes 2} + \mathbf{E}, (\xi_i \mathbf{u}_i + \eta_i \mathbf{u}_i^\perp)^{\otimes 2} \right\rangle \\ &= \left\langle \alpha_i \mathbf{u}_i^{\otimes 2} + \sum_{j \neq i, j \in [r]} \alpha_j \mathbf{u}_j^{\otimes 2} + \mathbf{E}, \xi_i^2 \mathbf{u}_i^{\otimes 2} + 2\xi_i \eta_i \mathbf{u}_i \otimes \mathbf{u}_i^\perp + \eta_i^2 (\mathbf{u}_i^\perp)^{\otimes 2} \right\rangle \\ &= \alpha_i \xi_i^2 + 2\xi_i \eta_i \left\langle \mathbf{E}, \mathbf{u}_i \otimes \mathbf{u}_i^\perp \right\rangle + \eta_i^2 \left\langle \sum_{j \neq i, j \in [r]} \alpha_j \mathbf{u}_j^{\otimes 2} + \mathbf{E}, (\mathbf{u}_i^\perp)^{\otimes 2} \right\rangle, \end{aligned} \quad (37)$$

where the last line uses the fact that  $\langle \mathbf{E}, \mathbf{u}_i^{\otimes 2} \rangle = 0$ ,  $\langle \mathbf{u}_i, \mathbf{u}_i^\perp \rangle = 0$  and  $\langle \mathbf{u}_i, \mathbf{u}_j \rangle = 0$  for all  $j \neq i$ . By assumption,  $\text{Loss}(\widehat{\mathbf{u}}_i, \mathbf{u}_i) \leq 2\varepsilon/\lambda_i + o(\varepsilon)$ . This implies  $|\eta_i| = |\langle \widehat{\mathbf{u}}_i, \mathbf{u}_i^\perp \rangle| = [1 - \cos^2 \Theta(\widehat{\mathbf{u}}_i, \mathbf{u}_i)]^{1/2} \leq \text{Loss}(\widehat{\mathbf{u}}_i, \mathbf{u}_i)[1 - \frac{1}{4} \text{Loss}^2(\widehat{\mathbf{u}}_i, \mathbf{u}_i)]^{1/2} \leq \text{Loss}(\widehat{\mathbf{u}}_i, \mathbf{u}_i) = O(\varepsilon)$ , and  $|\xi_i| = (1 - \eta_i^2)^{1/2} \geq 1 - O(\varepsilon)$ . It then follows from (37) that

$$\xi_i^2 |\alpha_i| = \left| 2\xi_i \eta_i \left\langle \mathbf{E}, \mathbf{u}_i \otimes \mathbf{u}_i^\perp \right\rangle + \eta_i^2 \left\langle \sum_{j \neq i, j \in [r]} \alpha_j \mathbf{u}_j^{\otimes 2} + \mathbf{E}, (\mathbf{u}_i^\perp)^{\otimes 2} \right\rangle \right|$$

$$\begin{aligned}
&\leq 2|\xi_i\eta_i| \left| \left\langle \mathbf{E}, \mathbf{u}_i \otimes \mathbf{u}_i^\perp \right\rangle \right| + \eta_i^2 \left( \sum_{j \neq i, j \in [r]} \left| \alpha_j \left\langle \mathbf{u}_j^{\otimes 2}, (\mathbf{u}_i^\perp)^{\otimes 2} \right\rangle \right| + \left| \left\langle \mathbf{E}, (\mathbf{u}_i^\perp)^{\otimes 2} \right\rangle \right| \right) \\
&\leq 2|\xi_i\eta_i| \|\mathbf{E}\|_\sigma + \eta_i^2 \left( \sum_{j \neq i, j \in [r]} |\alpha_j| + \|\mathbf{E}\|_\sigma \right) \\
&\leq O(\varepsilon) \left( \frac{2d^{(k-3)/2}}{\lambda_{\min}} \varepsilon + o(\varepsilon) \right) + O(\varepsilon^2) \left( 1.12r + \frac{2d^{(k-3)/2}}{\lambda_{\min}} \varepsilon + o(\varepsilon) \right) = o(\varepsilon),
\end{aligned}$$

where the last line follows from  $|\eta_i| \leq O(\varepsilon)$ ,  $|\xi_i| \leq 1$ ,  $\|\mathbf{E}\|_\sigma \leq \frac{2d^{(k-3)/2}\varepsilon}{\lambda_{\min}} + o(\varepsilon)$  (cf. (36)) and  $\max_{i \in [r]} |\alpha_i| \leq 1.12$  (cf. Corollary C.15). Therefore, since  $|\xi_i| \geq 1 - O(\varepsilon)$ , we conclude that  $|\alpha_i| = o(\varepsilon)$  for all  $i \in X$ .

Now write (35) as

$$\mathbf{M} = \sum_{i \in [r] \setminus X} \alpha_i \mathbf{u}_i^{\otimes 2} + \sum_{i \in X} \alpha_i \mathbf{u}_i^{\otimes 2} + \mathbf{E},$$

Note that  $\sum_{i \in [r] \setminus X} \alpha_i \mathbf{u}_i^{\otimes 2} \in \mathcal{LS}_0(X) \stackrel{\text{def}}{=} \text{Span}\{\mathbf{u}_i^{\otimes 2} : i \in [r] \setminus X\}$ . Hence,

$$\min_{\mathbf{M}^* \in \mathcal{LS}_0(X)} \|\mathbf{M} - \mathbf{M}^*\|_\sigma \leq \left\| \sum_{i \in X} \alpha_i \mathbf{u}_i^{\otimes 2} + \mathbf{E} \right\|_\sigma \leq \max_{i \in X} |\alpha_i| + \|\mathbf{E}\|_\sigma \leq \frac{2d^{(k-3)/2}\varepsilon}{\lambda_{\min}} + o(\varepsilon).$$

Since the above holds for all  $\mathbf{M} \in \mathcal{LS}(X)$  that satisfies  $\|\mathbf{M}\|_F = 1$ , taking maximum over  $\mathbf{M}$  yields the desired result.  $\square$

#### C.4.5 Proof of Theorem 4.9

We use the following lemma [1] in our proof of Theorem 4.9.

**Lemma C.19.** *Fix a subset  $X \subset [r]$  and assume that  $0 \leq \varepsilon \leq \lambda_i/2$  for each  $i \in X$ . Choose any  $\{\widehat{\mathbf{u}}_i, \widehat{\lambda}_i\}_{i \in X} \subset \mathbb{R}^d \times \mathbb{R}$  such that*

$$|\lambda_i - \widehat{\lambda}_i| \leq \varepsilon, \quad \|\widehat{\mathbf{u}}_i\|_2 = 1, \quad \text{and} \quad \langle \mathbf{u}_i, \widehat{\mathbf{u}}_i \rangle \geq 1 - 2(\varepsilon/\lambda_i)^2 > 0,$$

and define tensor  $\Delta_i := \lambda_i \mathbf{u}_i^{\otimes k} - \widehat{\lambda}_i \widehat{\mathbf{u}}_i^{\otimes k}$  for  $i \in X$ . Pick any unit vector  $\mathbf{a} = \sum_{i=1}^d a_i \mathbf{u}_i$ . Then, there exist positive constants  $C_1, C_2 > 0$ , depending only on  $k$ , such that

$$\left\| \sum_{i \in X} \Delta_i \mathbf{a}^{\otimes k-1} \right\|_\sigma \leq C_1 \left( \sum_{i \in X} |a_i|^{k-1} \varepsilon \right) + C_2 \left( |X| \left( \frac{\varepsilon}{\lambda_{\min}} \right)^{k-1} \right), \quad (38)$$

where  $\Delta_i \mathbf{a}^{\otimes k-1} := \Delta_i(\mathbf{a}, \dots, \mathbf{a}, \mathbf{I}) \in \mathbb{R}^d$ .

Proof of Theorem 4.9. We prove the conclusion

$$\text{Loss}(\widehat{\mathbf{u}}_i, \mathbf{u}_{\pi(i)}) \leq \frac{2\varepsilon}{\lambda_{\pi(i)}} + o(\varepsilon), \quad \text{Loss}(\widehat{\lambda}_i, \lambda_{\pi(i)}) \leq 2\varepsilon + o(\varepsilon), \quad (39)$$

by induction on  $i$ . For  $i = 1$ , the error bound of  $\{(\widehat{\mathbf{u}}_1, \widehat{\lambda}_1) \in \mathbb{R}^d \times \mathbb{R}\}$  follows readily from Lemmas 4.5–4.7. Now suppose (39) holds for  $i \leq s$ . Taking  $X = [s]$  in Lemma 4.8 yields the deviation of  $\mathcal{LS}(X)$  from  $\mathcal{LS}_0(X)$ ,

$$\max_{\mathbf{M} \in \mathcal{LS}(X), \|\mathbf{M}\|_F = 1} \min_{\mathbf{M}^* \in \mathcal{LS}_0(X)} \|\mathbf{M} - \mathbf{M}^*\|_\sigma \leq \frac{2d^{(k-3)/2}\varepsilon}{\lambda_{\min}} + o(\varepsilon). \quad (40)$$

Applying Theorem 4.4 and Lemmas 4.5–4.7 to  $i = s + 1$  with  $\varepsilon$  replaced by  $2\varepsilon$  (because of the additional factor “2” in (40) compared to Theorem 4.4), we obtain

$$\text{Loss}(\widehat{\mathbf{u}}_{s+1}, \mathbf{u}_{\pi(s+1)}) \leq \frac{2\varepsilon}{\lambda_{\pi(s+1)}} + o(\varepsilon), \quad \text{Loss}(\widehat{\lambda}_{s+1}, \lambda_{\pi(s+1)}) \leq 2\varepsilon + o(\varepsilon).$$

So (39) also holds for  $i = s + 1$ .

It remains to bound the residual tensor  $\Delta\tilde{\mathcal{T}} \stackrel{\text{def}}{=} \tilde{\mathcal{T}} - \sum_{i \in [r]} \hat{\lambda}_i \hat{\mathbf{u}}_i^{\otimes k}$ . Note that  $\text{Loss}(\hat{\mathbf{u}}_i, \mathbf{u}_{\pi(i)}) \leq 2\varepsilon/\lambda_{\pi(i)} + o(\varepsilon)$  implies  $\langle \hat{\mathbf{u}}_i, \mathbf{u}_{\pi(i)} \rangle = 1 - \frac{1}{2} \text{Loss}^2(\hat{\mathbf{u}}_i, \mathbf{u}_{\pi(i)}) \geq 1 - 2(\varepsilon/\lambda_{\pi(i)})^2 + o(\varepsilon^2)$ . When  $c_0$  is sufficiently large (i.e.,  $\varepsilon$  is sufficiently small),  $\hat{\mathbf{u}}_i$  is approximately parallel to  $\mathbf{u}_{\pi(i)}$  and orthogonal to  $\mathbf{u}_j$  for all  $j \neq \pi(i)$ . For ease of notation, we renumber the indices and assume  $\pi(i) = i$  for all  $i \in [r]$ . Following the definition of  $\Delta_i$  in Lemma C.19,

$$\|\Delta\tilde{\mathcal{T}}\|_{\sigma} = \left\| \sum_{i \in [r]} \lambda_i \mathbf{u}_i^{\otimes k} + \mathcal{E} - \sum_{i \in [r]} \hat{\lambda}_i \hat{\mathbf{u}}_i^{\otimes k} \right\|_{\sigma} = \left\| \sum_{i \in [r]} \Delta_i + \mathcal{E} \right\|_{\sigma}.$$

Now taking  $X = [r]$  in (38) gives

$$\begin{aligned} \|\Delta\tilde{\mathcal{T}}\|_{\sigma} &\leq \max_{\mathbf{a} \in \mathbf{S}^{d-1}} \left\| \sum_{i \in [r]} \Delta_i \mathbf{a}^{\otimes (k-1)} \right\|_{\sigma} + \varepsilon \\ &\leq \max_{\mathbf{a} \in \mathbf{S}^{d-1}} C_1 \sum_{i \in [r]} |a_i|^{k-1} \varepsilon + C_2 r \left( \frac{\varepsilon}{\lambda_{\min}} \right)^{k-1} + \varepsilon \\ &\leq \max_{\mathbf{a} \in \mathbf{S}^{d-1}} C_1 \varepsilon \sum_{i \in [r]} |a_i|^2 + C_2 r \left( \frac{\varepsilon}{\lambda_{\min}} \right)^2 + \varepsilon \\ &\leq C\varepsilon + o(\varepsilon), \end{aligned}$$

where the third line comes from the fact that  $k \geq 3$ ,  $|a_i| \leq 1$ , and  $\varepsilon/\lambda_{\min} \leq 1$  from Assumption 4.1.  $\square$

## D Supplementary Figures and Table

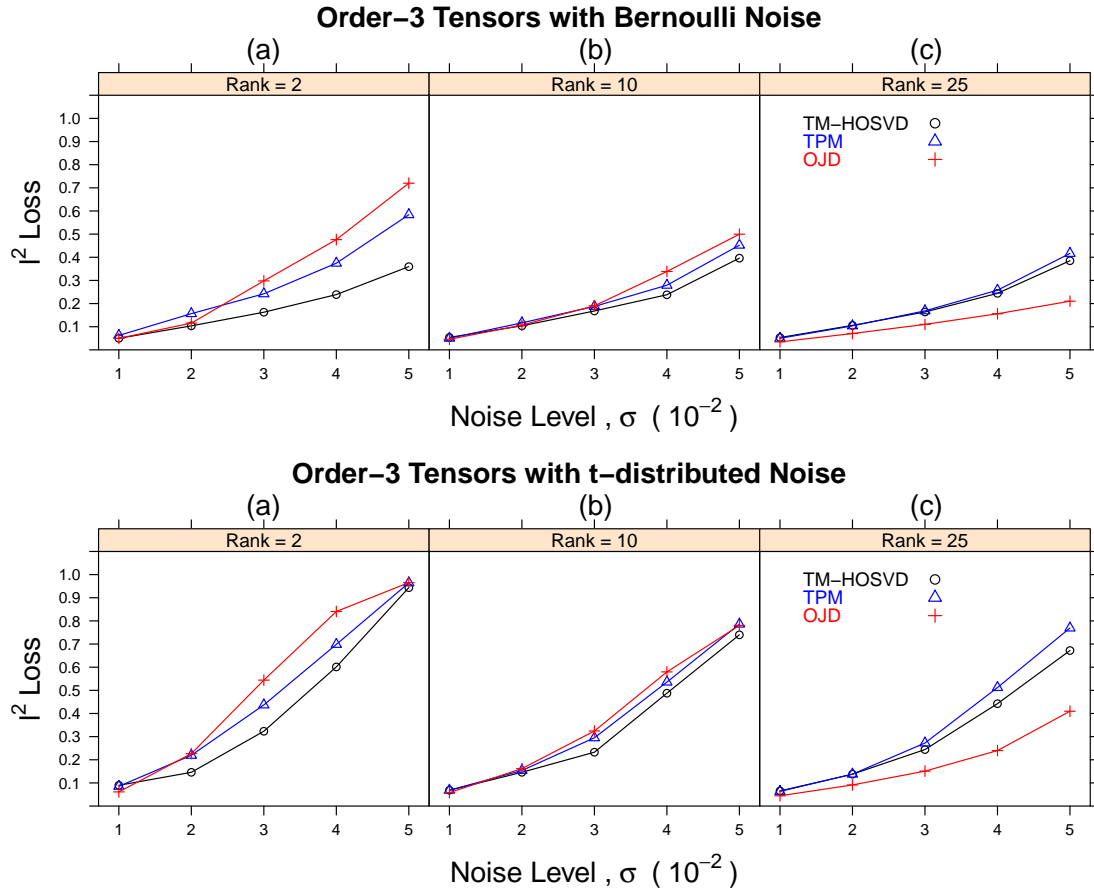

Supplementary Figure S1: Average  $l^2$  Loss for decomposing order-3 nearly SOD tensors with Bernoulli/T-distributed noise,  $d = 25$ .

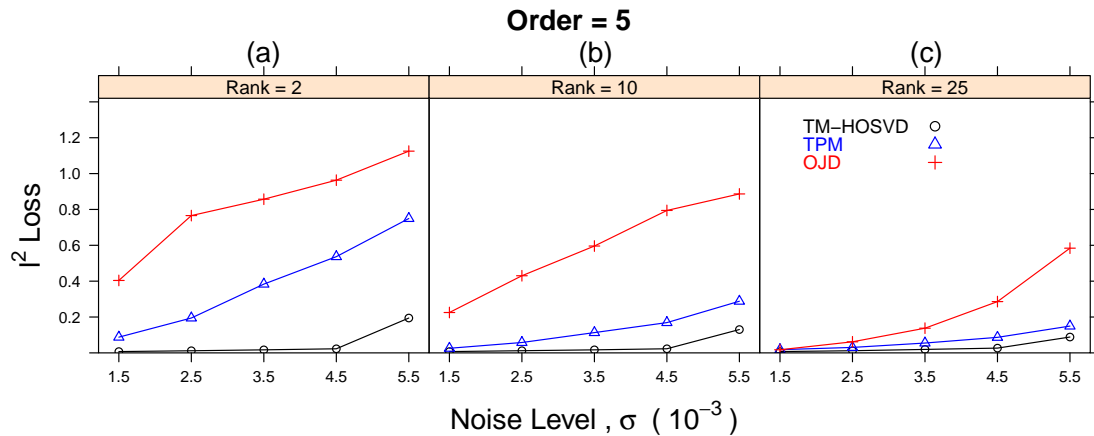

Supplementary Figure S2: Average  $l^2$  Loss for decomposing order-5 nearly SOD tensors with Gaussian noise,  $d = 25$ .



---

Supplementary Table S1: Runtime for decomposing nearly-SOD tensors with Gaussian noise,  $d = 25$ .

| Order | Rank | Noise Level ( $\sigma$ ) | Time (sec.) |      |      |
|-------|------|--------------------------|-------------|------|------|
|       |      |                          | TM-HOSVD    | TPM  | OJD  |
| 3     | 2    | $5 \times 10^{-2}$       | 0.08        | 0.01 | 0.13 |
| 3     | 10   | $5 \times 10^{-2}$       | 0.20        | 0.03 | 0.80 |
| 3     | 25   | $5 \times 10^{-2}$       | 0.47        | 0.07 | 0.92 |
| 4     | 2    | $1.5 \times 10^{-2}$     | 0.13        | 0.06 | 0.12 |
| 4     | 10   | $1.5 \times 10^{-2}$     | 0.29        | 0.14 | 1.06 |
| 4     | 25   | $1.5 \times 10^{-2}$     | 0.57        | 0.25 | 1.58 |
| 5     | 2    | $5.5 \times 10^{-3}$     | 0.25        | 0.51 | 0.14 |
| 5     | 10   | $5.5 \times 10^{-3}$     | 0.45        | 1.98 | 1.01 |
| 5     | 25   | $5.5 \times 10^{-3}$     | 0.87        | 4.27 | 2.66 |

## References

- [1] MU, C., HSU, D., AND GOLDFARB, D. Successive rank-one approximations for nearly orthogonally decomposable symmetric tensors. *SIAM Journal on Matrix Analysis and Applications* 36, 4 (2015), 1638–1659.
- [2] WANG, M., DAO DUC, K., FISCHER, J., AND SONG, Y. S. Operator norm inequalities between tensor unfoldings on the partition lattice. *Linear Algebra and its Applications* 520 (2017), 44–66.
- [3] WEDIN, P.-Å. Perturbation bounds in connection with singular value decomposition. *BIT Numerical Mathematics* 12, 1 (1972), 99–111.
- [4] WEYL, H. Inequalities between the two kinds of eigenvalues of a linear transformation. *Proceedings of the National Academy of Sciences* 35, 7 (1949), 408–411.
